# Supplementary material for: Decreased adipose tissue oxygenation associates with insulin resistance in individuals with obesity
Source: JCI journal article supplement (doi:10.1172/jci141828), 2020-11-08
Supplement: sd1 [file 1]

## Supplemental Data

**Supplementary Table 1.** Genes included in the angiogenesis gene set that were negatively associated with AT pO<sub>2</sub>.

| Gene                                                                            | Function     |
|---------------------------------------------------------------------------------|--------------|
| DAB2 interacting protein (DAB2IP)                                               | Angiogenesis |
| EPH receptor B2 (EPHB2)                                                         | Angiogenesis |
| Rho GTPase activating protein 22 (ARHGAP22)                                     | Angiogenesis |
| Thy-1 cell surface antigen (THY1)                                               | Angiogenesis |
| Cytochrome P450 family 1 subfamily B member 1 (CYP1B1)                          | Angiogenesis |
| Heme oxygenase 1 (HMOX1)                                                        | Angiogenesis |
| Phosphatidylinositol-4,5-bisphosphate 3-kinase catalytic subunit gamma (PIK3CG) | Angiogenesis |
| C-C motif chemokine ligand 2 (CCL2)                                             | Inflammation |
| C-X-C motif chemokine ligand 8 (CXCL8)                                          | Inflammation |
| C-X-C motif chemokine receptor 3 (CXCR3)                                        | Inflammation |
| TNF alpha induced protein 2 (TNFAIP2)                                           | Inflammation |
| TNF receptor superfamily member 12A (TNFRSF12A)                                 | Inflammation |
| Interleukin 18 (IL18)                                                           | Inflammation |
| Collagen type VIII alpha 2 chain (COL8A2)                                       | ECM          |
| Connective tissue growth factor (CTGF)                                          | ECM          |
| Fibronectin 1 (FN1)                                                             | ECM          |
| Integrin subunit alpha V (ITGAV)                                                | ECM          |

Genes were significantly ( $P < 0.005$ ) negatively associated with adipose tissue (AT) oxygen partial pressure (pO<sub>2</sub>) by using Pearson's correlation. Abbreviations: ECM, extracellular matrix.

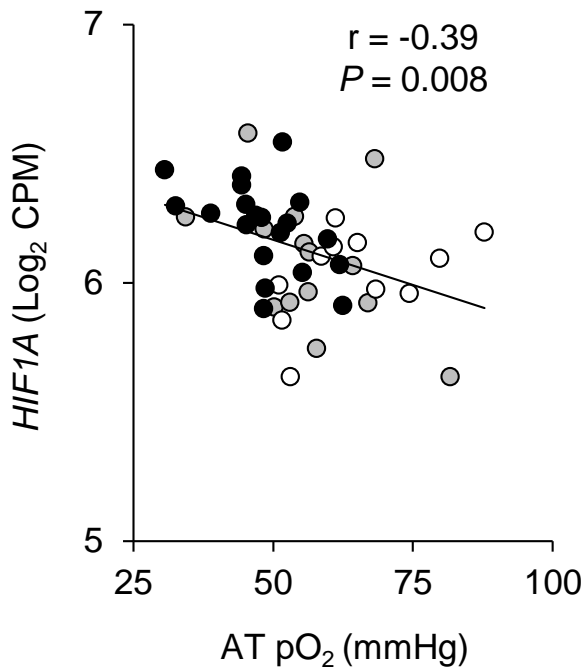

**Supplementary Figure 1. Adipose tissue oxygen tension is negatively associated with adipose tissue *HIF1A* expression.** Relationship between adipose tissue (AT) oxygen partial pressure (pO<sub>2</sub>) and AT *HIF1A* gene expression in metabolically-healthy lean (white circles; n=11), metabolically-healthy obese (grey circles; n=14) and metabolically-unhealthy obese (black circles; n=20) participants. Associations between AT pO<sub>2</sub> and AT *HIF1A* gene expression were determined by using Pearson's correlation coefficient.

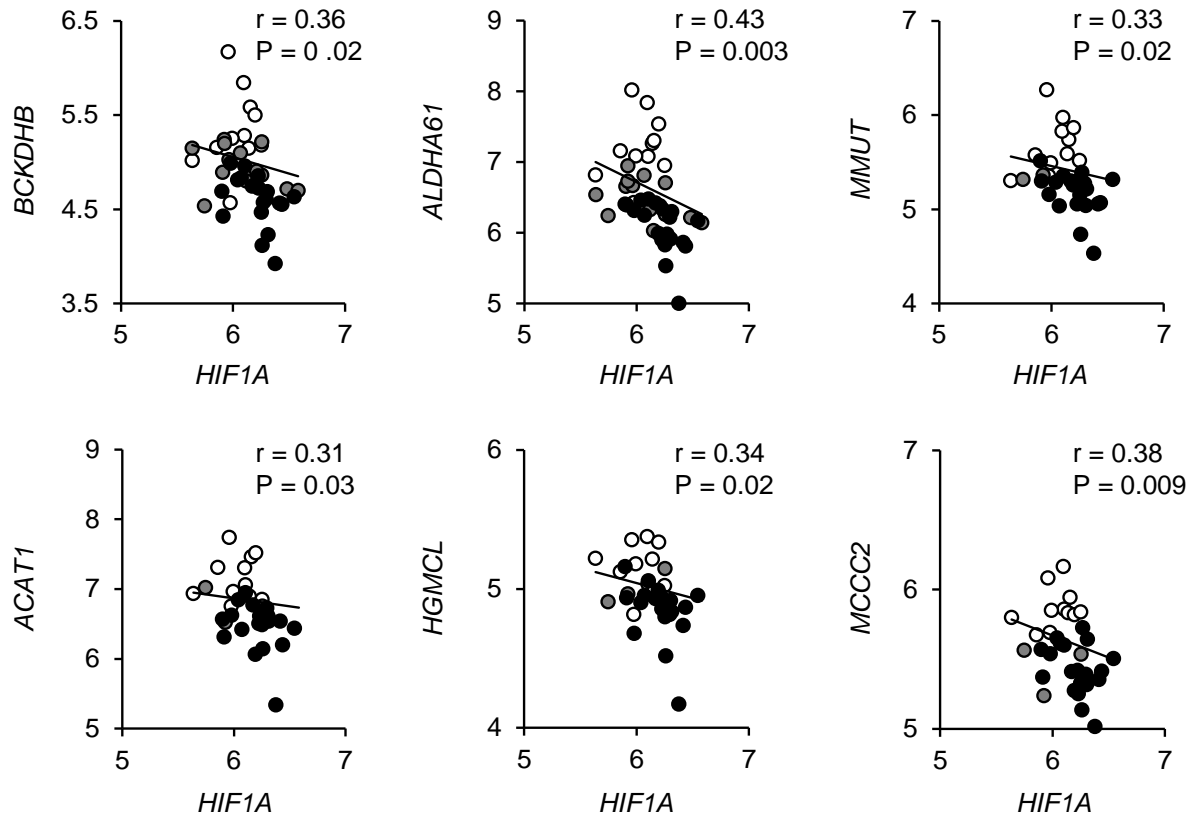

**Supplementary Figure 2. Adipose tissue *HIF1A* gene expression is negatively associated with adipose tissue expression of genes involved in BCAA catabolism.** Relationship between adipose tissue (AT) *HIF1A* and expression of AT genes involved in regulating branched-chain amino acid (BCAA) catabolism in metabolically-healthy lean (white circles; n=11), metabolically-healthy obese (grey circles; n=14) and metabolically-unhealthy obese (black circles; n=20) participants. Gene expression values are log<sub>2</sub> counts per million reads. Associations between AT *HIF1A* and BCAA enzyme gene expression were determined by using Pearson's correlation coefficient.
